1 **Regulation of (p)ppGpp hydrolysis by a conserved archetypal**  
2 **regulatory domain**

3 Séverin Ronneau<sup>1§</sup>, Julien Caballero-Montes<sup>2</sup>, Aurélie Mayard<sup>1</sup>, Abel Garcia-Pino<sup>2</sup>  
4 and Régis Hallez<sup>1#</sup>

5  
6 <sup>1</sup>*Bacterial Cell cycle & Development (BCcD), Biology of Microorganisms Research*  
7 *Unit (URBM), Namur Research Institute for Life Science (NARILIS), University of*  
8 *Namur, 61 Rue de Bruxelles, 5000 Namur, Belgium*

9 <sup>2</sup>*Cellular and Molecular Microbiology, Université Libre de Bruxelles (ULB), 12 rue des*  
10 *Professeurs Jeener et Brachet, B-6041 Gosselies, Belgium*

11 <sup>§</sup>*Present address : MRC Centre for Molecular Bacteriology and Infection, Flowers*  
12 *Building, Armstrong Road, Imperial College London, London SW7 2AZ, UK*

13  
14  
15 <sup>#</sup>Corresponding author: Tel: +32 81 724 244; E-mail: [regis.hallez@unamur.be](mailto:regis.hallez@unamur.be)

16  
17 Running title: ACT-dependent hydrolysis of (p)ppGpp by SpoT

18  
19 Key words: PTS, SpoT, (p)ppGpp, ACT domain, alarmone, *Caulobacter*,  
20 *Sinorhizobium*

21

22 **Abstract**

23 Sensory and regulatory domains allow bacteria to adequately respond to  
24 environmental changes. The regulatory ACT domains are mainly found in metabolic-  
25 related proteins as well as in long (p)ppGpp synthetase/hydrolase (SD/HD) enzymes.  
26 Here, we investigate the functional role of the ACT domain of SpoT, the only  
27 (p)ppGpp SD/HD of *Caulobacter crescentus*. We show that SpoT requires the ACT  
28 domain to hydrolyse ppGpp in an efficient way. In addition, our *in vivo* and *in vitro*  
29 data show that the phosphorylated version of EIIA<sup>Ntr</sup> (EIIA<sup>Ntr</sup>~P) interacts directly with  
30 the ACT to inhibit the hydrolase activity of SpoT. Finally, we highlight the  
31 conservation of the ACT-dependent interaction between EIIA<sup>Ntr</sup>~P and SpoT/Rel  
32 along with the PTS<sup>Ntr</sup>-dependent regulation of (p)ppGpp accumulation upon nitrogen  
33 starvation in *Sinorhizobium meliloti*, a plant-associated  $\alpha$ -proteobacterium. Thus, this  
34 work suggests that  $\alpha$ -proteobacteria might have inherited from a common ancestor, a  
35 PTS<sup>Ntr</sup> dedicated to modulate (p)ppGpp levels.

36

## 37 Introduction

38 Bacteria use a wide range of sensory and regulatory domains to integrate  
39 environmental signals. In response to nutrient limitation, most bacteria synthesize a  
40 second messenger, the guanosine (penta) tetra-phosphate commonly referred to as  
41 (p)ppGpp. This molecule helps in reallocating cellular resources notably by  
42 reprogramming transcription and interfering with cell cycle progression (Hallez et al.,  
43 2017; Hauryliuk et al., 2015). In *Escherichia coli*, (p)ppGpp levels are regulated by  
44 RelA and SpoT, two long RelA/SpoT homolog (RSH) enzymes. SpoT carries a  
45 synthetase domain (SD) that is poorly activated by starvation signals (carbon, fatty  
46 acids, phosphate, ...) and a functional hydrolase domain (HD). By contrast, RelA  
47 harbours a SD activated by amino acids scarcity and a degenerated and inactive HD  
48 domain (reviewed in (Potrykus and Cashel, 2008) and (Hauryliuk et al., 2015)).  
49 Despite these differences, both RSH enzymes present the same domain architecture  
50 with catalytic domains (SD and HD) located towards the N-terminus (NTD) and  
51 regulatory domains (TGS for ThrRS, GTPase and SpoT and ACT for Aspartokinase,  
52 Chorismate mutase and TyrA) at the C-terminal end (CTD) (**Figure 1**). The CTD is  
53 thought to play a critical role in RSH by sensing the starvation signal and transducing  
54 it to the catalytic domains. RelA for example is known to be associated with the  
55 ribosome where it detects deacylated tRNA in the ribosomal acceptor site (A-site) as  
56 a signal for amino acid starvation, which activates SD activity (Haseltine and Block,  
57 1973). Recent studies using cryo-electron microscopy revealed that *E. coli* RelA  
58 adopts an extended “open” conformation on stalled ribosomes with the A-site/tRNA in  
59 contact with the TGS domain in CTD (Arenz et al., 2016; Brown et al., 2016;  
60 Loveland et al., 2016). Likewise, activation of SpoT SD activity in *E. coli* cells starved  
61 for fatty acids has been shown to require an acyl carrier protein (ACP) that binds to  
62 the TGS of SpoT (Battesti and Bouveret, 2006). Although the role of CTD is  
63 undoubtedly critical for regulating catalytic functions of RSH, the mechanisms by  
64 which this regulation is mediated remain unknown.

65 In contrast to *E. coli*, most  $\alpha$ -proteobacteria encode bifunctional (SD/HD) RSH usually  
66 referred to as SpoT or Rel (Atkinson et al., 2011). This is the case of *Caulobacter*  
67 *crescentus* that harbours a single RSH (SpoT) sensitive to nitrogen or carbon  
68 starvation (Boutte and Crosson, 2011; Lesley and Shapiro, 2008). *C. crescentus*

69 divides asymmetrically to generate two dissimilar progeny, a motile swarmer cell and  
70 a sessile stalked cell. The stalked cell initiates a new replication cycle (S phase)  
71 immediately at birth whereas the swarmer cell first enters into a non-replicative G1  
72 phase before starting replication and concomitantly differentiating into a stalked cell  
73 (Curtis and Brun, 2010). Once accumulated, (p)ppGpp modulates cell cycle  
74 progression by specifically extending the G1/swarmer phase (Chiaverotti et al., 1981;  
75 Gonzalez and Collier, 2014). Recently, we reported a key role played by the nitrogen-  
76 related phosphotransferase system (PTS<sup>Ntr</sup>) in regulating (p)ppGpp accumulation in  
77 response to nitrogen starvation (Ronneau et al., 2016). We showed that EI<sup>Ntr</sup>, the first  
78 protein of PTS<sup>Ntr</sup>, uses intracellular glutamine concentration as a proxy for nitrogen  
79 availability, since glutamine binds to the GAF domain of EI<sup>Ntr</sup> to inhibit its  
80 autophosphorylation. Therefore, glutamine deprivation strongly stimulates  
81 autophosphorylation of EI<sup>Ntr</sup>, which in turn triggers phosphorylation of the  
82 downstream components HPr and EIIA<sup>Ntr</sup>. Once phosphorylated, both HPr~P and  
83 EIIA<sup>Ntr</sup>~P modulate activities of SpoT to quickly increase (p)ppGpp levels. Whereas  
84 HPr~P stimulates SD activity of SpoT by an unknown mechanism, EIIA<sup>Ntr</sup>~P interacts  
85 directly with SpoT to interfere with its HD activity (Ronneau et al., 2016). The plant-  
86 associated  $\alpha$ -proteobacterium *Sinorhizobium meliloti* also accumulates (p)ppGpp  
87 upon nitrogen or carbon starvation from a single RSH called Rel (Krol and Becker,  
88 2011; Wells and Long, 2002), but the mechanism beyond this regulation remains  
89 unknown.

90 In this work, we investigate the role of the ACT domain in regulating the activity of  
91 RSH enzymes. In particular, we show that the ACT domain is indispensable for HD  
92 activity of *C. crescentus* SpoT and that EIIA<sup>Ntr</sup>~P inhibits (p)ppGpp hydrolysis by  
93 directly interacting with ACT of SpoT. In addition, we show that the EIIA<sup>Ntr</sup>~P-  
94 mediated regulation of RSH is conserved in *S. meliloti*, suggesting PTS<sup>Ntr</sup> plays a  
95 critical role in sensing metabolic state and regulating cell cycle progression in  $\alpha$ -  
96 proteobacteria.

97

## 98 Results

99

### 100 EIIA<sup>Ntr</sup>~P interacts directly with the ACT domain of SpoT

101 We showed previously that only the phosphorylated version of *C. crescentus* EIIA<sup>Ntr</sup>  
102 (EIIA<sup>Ntr</sup>~P) was able to interact with SpoT in a bacterial two-hybrid (BTH) assay  
103 (Ronneau et al., 2016). To map the domains of SpoT interacting with EIIA<sup>Ntr</sup>~P, we  
104 used truncated versions of SpoT in a BTH assay (**Figure 1a**). We found that deleting  
105 the ACT domain (SpoT<sub>ΔACT</sub>) precluded the interaction with EIIA<sup>Ntr</sup>~P and with the  
106 isolated ACT domain (ACT<sub>506-742</sub>), but not with full-length SpoT (**Figure 1b-c**).  
107 Moreover, the ACT domain alone was able to strongly interact with EIIA<sup>Ntr</sup>~P (**Figure**  
108 **1b-c**) as well as with itself (**Figure 1 – figure supplement 1**). Together, these  
109 results suggest that ACT-ACT interactions occur between SpoT subunits and show  
110 that the ACT domain is required to mediate the interaction between SpoT and  
111 EIIA<sup>Ntr</sup>~P.

112

### 113 Inactivating the ACT domain increases (p)ppGpp levels

114 Disrupting the interaction between SpoT and EIIA<sup>Ntr</sup>~P should release the hydrolase  
115 (HD) activity of SpoT, since strains that either did not express EIIA<sup>Ntr</sup> ( $\Delta ptsN$ ) or  
116 expressed only the non-phosphorylated form of EIIA<sup>Ntr</sup> ( $\Delta ptsP$ ,  $\Delta ptsH$  or  $ptsN_{H66A}$ )  
117 actively hydrolysed (p)ppGpp *in vivo* (Ronneau et al., 2016). Accordingly, a *C.*  
118 *crescentus* strain expressing  $spoT_{\Delta ACT}$  as the only copy of  $spoT$  should phenocopy  
119 the  $\Delta ptsP$  strain by decreasing motility and shortening G1 lifetime (Ronneau et al.,  
120 2016). Surprisingly, we found that  $spoT_{\Delta ACT}$  cells phenocopied rather the HD-dead  
121 mutant  $spoT_{D81G}$  than  $\Delta ptsP$  (Ronneau et al., 2016) Indeed, the  $spoT_{\Delta ACT}$  mutation  
122 led to an increase of motility, an accumulation of G1/swarmer cells and a growth  
123 delay in PYE complex medium (**Figure 2a-d**). As for  $spoT_{D81G}$ , these phenotypes  
124 might be due to a (p)ppGpp excess in  $spoT_{\Delta ACT}$ . In support of this,  $spoT_{\Delta ACT}$  cells  
125 accumulated (p)ppGpp without stress (**Figure 2e**). In addition, abolishing the  
126 synthetase (SD) activity in  $spoT_{\Delta ACT}$  cells, either by deleting  $ptsP$  (EII<sup>Ntr</sup>) or by  
127 incorporating a Y323A substitution into SpoT ( $spoT_{Y323A \Delta ACT}$ ) known to specifically  
128 inactivate SD activity (Boutte and Crosson, 2011; Ronneau et al., 2016), suppressed  
129 all the phenotypes (**Figure 2a-e and Figure 2 – figure supplement 1a**). The  
130 (p)ppGpp accumulation observed in  $spoT_{\Delta ACT}$  cells could be due to an increase of SD

131 activity or a decrease of HD activity. To discriminate between these two possibilities,  
132 we measured (p)ppGpp levels in nitrogen-deplete (-N) conditions, which mainly relies  
133 on SD (Ronneau et al., 2016). We observed that SpoT<sub>ΔACT</sub> and SpoT<sub>D81G</sub> protein  
134 levels in the corresponding mutant strains were slightly higher than the SpoT level in  
135 the wild-type strain (**Figure 2 – figure supplement 1b-c**). Nevertheless, upon  
136 nitrogen starvation, neither *spoT*<sub>ΔACT</sub> nor *spoT*<sub>D81G</sub> cells produced more (p)ppGpp  
137 than wild-type cells (**Figure 2 – figure supplement 1d**). This suggests that SD  
138 activity is not enhanced in the of *spoT*<sub>ΔACT</sub> or *spoT*<sub>D81G</sub> strains. The slight increase of  
139 SpoT<sub>ΔACT</sub> and SpoT<sub>D81G</sub> levels is likely a result of the positive feedback loop of  
140 (p)ppGpp on *spoT* promoter. Indeed, P<sub>*spoT*</sub> displayed higher activity in strains  
141 accumulating (p)ppGpp (*ptsP*<sub>L83Q</sub> and P<sub>*xyIX::relA-FLAG*</sub>) and lower activity in ppGpp<sup>0</sup>  
142 strains (*ΔptsP*, *ΔptsH* and *ΔptsN*), so that SpoT protein levels varied according to  
143 (p)ppGpp levels (**Figure 2 – figure supplement 1e-g**). Thus, the higher  
144 concentration of (p)ppGpp detected in *spoT*<sub>ΔACT</sub> cells may come from an inactivation  
145 of HD activity, thereby suggesting that ACT is required for HD activity.

146

#### 147 **The hydrolase activity of SpoT requires the ACT domain**

148 To test whether ACT was required for HD activity, we first measured the endogenous  
149 HD activity of SpoT *in vivo* (Ronneau et al., 2016). To this end, we used *C.*  
150 *crescentus* strains in which (p)ppGpp (i) cannot be produced anymore by the  
151 endogenous SpoT since its SD activity has been inactivated with the Y323A mutation  
152 (Boutte and Crosson, 2011), but (ii) can be synthesized upon addition of xylose by a  
153 truncated version of the *E. coli* RelA (p)ppGpp synthetase expressed from the xylose-  
154 inducible promoter (P<sub>*xyIX::relA-FLAG*</sub>) at the *xyIX* locus (Gonzalez and Collier, 2014).  
155 Thus in these strains the only HD activity capable to degrade (p)ppGpp produced by  
156 *E. coli* RelA was supplied by endogenous SpoT variants. In agreement with our  
157 previous observations, inactivation of SpoT HD in such a background (*spoT*<sub>D81G Y323A</sub>;  
158 P<sub>*xyIX::relA-FLAG*</sub>) led to a strong (p)ppGpp accumulation, an extension of the G1  
159 phase and a growth arrest (**Figure 3**; (Ronneau et al., 2016)). In contrast, releasing  
160 SpoT HD activity (*ΔptsP spoT*<sub>Y323A</sub>; P<sub>*xyIX::relA-FLAG*</sub>) led to undetectable levels of  
161 (p)ppGpp, a reduced G1 phase and an optimal growth (**Figure 3**; (Ronneau et al.,  
162 2016)). Interestingly, deleting the ACT domain of SpoT (*spoT*<sub>Y323A ΔACT</sub>; P<sub>*xyIX::relA-*</sub>

163 *FLAG*) led to a (p)ppGpp accumulation, a G1 proportion and a growth rate similar to  
164 the HD-dead mutant (*spoT*<sub>D81G Y323A</sub>; P<sub>xyIX::relA-FLAG</sub>), and this independently of the  
165 presence of *ptsP* (**Figure 3**).

166 These data strongly suggest that the ACT domain is strictly required *in vivo* for the  
167 hydrolase activity of SpoT and that EIIA<sup>Ntr</sup>~P inhibits HD activity of SpoT by  
168 interfering with the ACT domain. To test these hypotheses, we performed *in vitro* HD  
169 assays with the full-length enzyme and mutants lacking the ACT domain (SpoT<sub>ΔACT</sub>)  
170 or containing only the two catalytic domains (SpoT<sub>1-373</sub>). We observed that full-length  
171 SpoT could efficiently degrade [<sup>32</sup>P]ppGpp but the deletion of the ACT domain in both  
172 SpoT<sub>ΔACT</sub> and SpoT<sub>1-373</sub> strongly affected HD activity, since radiolabelled [<sup>32</sup>P]ppGpp  
173 remained mostly intact in the presence of both ACT-deficient SpoT variants (**Figure**  
174 **4a**, compare lane 3 to lanes 4-7). To check whether phosphorylated EIIA<sup>Ntr</sup> could  
175 modulate the HD activity of SpoT, [<sup>32</sup>P]ppGpp hydrolysis was measured in the  
176 presence of EIIA<sup>Ntr</sup> and non-phosphorylatable (EIIA<sup>Ntr</sup><sub>H66A</sub>) or phosphomimetic  
177 (EIIA<sup>Ntr</sup><sub>H66E</sub>) version of EIIA<sup>Ntr</sup>. We found that only EIIA<sup>Ntr</sup><sub>H66E</sub> was able to interfere with  
178 SpoT HD activity (**Figure 4b-c**). The role of phosphorylation was further confirmed  
179 using EIIA<sup>Ntr</sup>~P. Our results show that EIIA<sup>Ntr</sup>~P efficiently inhibited SpoT HD activity,  
180 protecting [<sup>32</sup>P]ppGpp from hydrolysis (**Figure 4d and Figure 4 – figure supplement**  
181 **1**). Altogether, these data show that EIIA<sup>Ntr</sup>~P inhibits the HD activity of SpoT by  
182 directly interacting and likely interfering with the ACT domain.

183

#### 184 **PTS<sup>Ntr</sup> regulates (p)ppGpp accumulation in *Sinorhizobium meliloti***

185 The inhibition of EII<sup>Ntr</sup> autophosphorylation by glutamine was first observed in the  $\gamma$ -  
186 proteobacterium *Escherichia coli* (Lee et al., 2013) and the plant-associated  $\alpha$ -  
187 proteobacterium *Sinorhizobium meliloti* (Goodwin and Gage, 2014). In addition, *S.*  
188 *meliloti* also accumulates (p)ppGpp in response to nitrogen starvation (Krol and  
189 Becker, 2011; Wells and Long, 2002). This suggests that PTS<sup>Ntr</sup> stimulates (p)ppGpp  
190 accumulation in response to glutamine deprivation as shown for *C. crescentus*  
191 (Ronneau et al., 2016). To test this hypothesis, we checked whether the nitrogen-  
192 related EIIA component of *S. meliloti* (EIIA<sup>Ntr</sup>) was able to interact with the  
193 bifunctional (SD/HD) RSH of *S. meliloti* (Rel) in a BTH assay. As shown in **Figure 5a**,  
194 the full-length Rel fused to T25 (T25-Rel) interacted with EIIA<sup>Ntr</sup> fused to T18 (T18-

195 EIIA<sup>Ntr</sup>). Similarly to *C. crescentus*, the deletion of ACT (T25-Rel<sub>ΔACT</sub>) abolished this  
196 interaction (**Figure 5a**). Another conserved feature is that phosphorylation of EIIA<sup>Ntr</sup>  
197 enhanced interaction with Rel. Indeed, we previously showed that (i) EIIA<sup>Ntr</sup> was  
198 phosphorylated in the BTH assay by the endogenous PTS<sup>Ntr</sup> system of *E. coli* (EI<sup>Ntr</sup>  
199 and NPr) and (ii) the interaction between SpoT and EIIA<sup>Ntr</sup> was altered in an *E. coli*  
200  $\Delta npr$  background (Ronneau et al., 2016). Likewise, the interaction between *S. meliloti*  
201 T18-EIIA<sup>Ntr</sup> and T25-Rel was strongly diminished in a  $\Delta npr$  background (**Figure 5b**).  
202 This indicates that phosphorylation of EIIA<sup>Ntr</sup> also enhances the interaction with Rel.  
203 We constructed single in-frame deletion of *ptsP* (SMc02437) and *rel* (SMc02659)  
204 genes to test the PTS<sup>Ntr</sup>-dependent accumulation of (p)ppGpp in *S. meliloti* in  
205 response to nitrogen deprivation. Upon nitrogen starvation (-N), neither  $\Delta rel$  nor  
206  $\Delta ptsP$  cells accumulated (p)ppGpp in contrast to wild-type cells (**Figure 5c**). The  
207 increase of G1 proportion that results from the accumulation of (p)ppGpp upon  
208 nutrient limitation was previously used to synchronize *S. meliloti* (De Nisco et al.,  
209 2014). Thus if PTS<sup>Ntr</sup> regulates (p)ppGpp levels, we reasoned that the G1 proportion  
210 of  $\Delta rel$  and  $\Delta ptsP$  populations should be reduced. This is exactly what we observed,  
211 with a proportion of G1 cells in the  $\Delta ptsP$  and  $\Delta rel$  strains reduced in comparison to  
212 the wild-type strain (**Figure 5d-e**). In contrast, the ectopic production of (p)ppGpp in  
213 non-starved *S. meliloti* cells with an IPTG-inducible version of RelA<sub>Ec</sub> strongly  
214 increased the proportion of G1 cells and led to growth arrest (**Figure 5 – figure**  
215 **supplement 1**). Altogether, these results support a conserved role of PTS<sup>Ntr</sup> in  
216 regulating (p)ppGpp accumulation in response to nitrogen starvation as well as in the  
217 control of cell cycle progression in *S. meliloti*.

218

## 219 **Discussion**

220 Two decades ago, mutational analysis of the *spoT* gene of *E. coli* suggested  
221 that the C-terminal end of SpoT including the ACT domain was required to bind  
222 regulators of the hydrolase activity of SpoT (Gentry and Cashel, 1996). Later,  
223 Mechold et al. reported that deleting the C-terminal domain of SpoT in *Streptococcus*  
224 *equisimilis* led to a strong inhibition of (p)ppGpp degradation *in vitro* of about 150 fold  
225 in comparison to the full-length protein (Mechold et al., 2002). In agreement with  
226 these studies, our work supports that the regulatory ACT domain modulates SpoT



227 hydrolase (HD) activity in *C. crescentus*. In a nitrogen-rich environment (+N), the  
228 ACT domain is free to stimulate HD activity, thereby limiting (p)ppGpp concentration.  
229 Upon nitrogen starvation (-N), the last component of the nitrogen-related PTS  
230 (PTS<sup>Ntr</sup>), EIIA<sup>Ntr</sup>, is phosphorylated and binds the ACT domain of SpoT. This physical  
231 interaction interferes with the ACT-dependent stimulation of SpoT HD activity (**Figure**  
232 **6**). The recent RelA structures on stalled ribosomes highlighted the role of C-terminal  
233 domain (CTD) in sensing nutrient availability (Arenz et al., 2016; Brown et al., 2016;  
234 Loveland et al., 2016). When bound to the ribosome, RelA adopts an “open”  
235 conformation, which is thought to relieve the inhibitory effect of CTD on its synthetase  
236 (SD) activity and leads to (p)ppGpp synthesis (Gropp et al., 2001). This “open”  
237 conformation seems to be favoured by specific interactions between the ribosome  
238 stalk, the A-site finger and the tRNAs with the CTD (Loveland et al., 2016). Given the  
239 conserved domain architecture of RelA and SpoT proteins, we propose that EIIA<sup>Ntr</sup>~P  
240 modulates SpoT conformation to decrease its HD activity (**Figure 6**). Since ACT  
241 seems to interact with itself, it is tempting to speculate that dimerization of ACT  
242 induces a conformation that enhances the HD activity. Oligomerization of long RSH  
243 has already been proposed to regulate their activity (Gropp et al., 2001; Jain et al.,  
244 2006). In such a scenario, EIIA<sup>Ntr</sup>~P would preclude or interfere with the active  
245 conformational state. The ACT domain is highly prevalent among RSH enzymes,  
246 thus the role of the ACT domain in sustaining the hydrolase activity in these RSH is  
247 likely conserved as well.

248 We also reported that SpoT<sub>ΔACT</sub> is still able to increase (p)ppGpp concentration upon  
249 nitrogen starvation by stimulating SD activity in a PTS<sup>Ntr</sup>-dependent way (**Figure 2 –**  
250 **figure supplement 1d**). This regulation could involve the TGS domain as described  
251 for *E. coli*, in which stimulation of SpoT SD activity upon fatty acid starvation depends  
252 on the TGS domain (Battesti and Bouveret, 2006). In support of this, deletion of the  
253 CTD harboring the TGS and the ACT domains completely abolished the ability of *C.*  
254 *crescentus* SpoT to produce (p)ppGpp upon nitrogen starvation (Boutte and Crosson,  
255 2011). Altogether, our data support that regulators bind to SpoT via the regulatory  
256 CTD domains to modulate enzymatic activities.

257 Besides *C. crescentus*, another  $\alpha$ -proteobacterium, *Sinorhizobium meliloti*, uses  
258 PTS<sup>Ntr</sup> to sense nitrogen starvation and to stimulate (p)ppGpp accumulation (**Figure**

259 **6).** We found that EIIA<sup>Ntr</sup> interacts with Rel (**Figure 5a**) and that phosphorylation of  
260 EIIA<sup>Ntr</sup> promotes this interaction (**Figure 5b**). As glutamine also inhibits  
261 phosphorylation of EI<sup>Ntr</sup> in *S. meliloti* (Goodwin and Gage, 2014), glutamine  
262 deprivation likely leads to hyperphosphorylation of downstream PTS<sup>Ntr</sup> components,  
263 favouring subsequent interaction between EIIA<sup>Ntr</sup>~P and Rel. In support of that, we  
264 showed *S. meliloti* required EI<sup>Ntr</sup> protein to accumulate (p)ppGpp upon nitrogen  
265 starvation (**Figure 5c**), as previously shown for *C. crescentus* (Ronneau et al., 2016).  
266 In addition, we observed that the physical interaction between Rel and the  
267 phosphorylated form of EIIA<sup>Ntr</sup> also occurs in another  $\alpha$ -proteobacterium,  
268 *Rhodobacter sphaeroides* (**Figure 5 – figure supplement 2**). Altogether, our data  
269 support that the PTS<sup>Ntr</sup>-dependent control of SpoT/Rel activities is another conserved  
270 feature in  $\alpha$ -proteobacteria (Hallez et al., 2004).  
271 Similarly to *C. crescentus* (Gonzalez and Collier, 2014; Ronneau et al., 2016), we  
272 found that (p)ppGpp accumulation also delays the G1-to-S transition in *S. meliloti*,  
273 (**Figure 5d-e and Figure 5 – figure supplement 2**). In fact, this feature has been  
274 used to synchronize a population of *S. meliloti* by transiently blocking bacteria  
275 starved for carbon and nitrogen in G1 phase of the cell cycle (De Nisco et al., 2014).  
276 The specific interference of (p)ppGpp with the G1-to-S transition of the cell cycle  
277 could be another conserved feature in  $\alpha$ -proteobacteria.

278

## 279 **Methods**

### 280 **Bacterial strains and growth conditions**

281 Oligonucleotides, strains and plasmids used in this study are listed in  
282 **Supplementary Tables 1, 2 and 3**, together with construction details provided in the  
283 Supplementary Methods. *Escherichia coli* Top10 was used for cloning purpose, and  
284 grown aerobically in Luria-Bertani (LB) broth (Invitrogen) (Casadaban and Cohen,  
285 1980). Electrocompetent cells were used for transformation of *E. coli*. All *Caulobacter*  
286 *crescentus* strains used in this study are derived from the synchronizable (NA1000)  
287 wild-type strain, and were grown in Peptone Yeast Extract (PYE) or synthetic M2 (20  
288 mM PO<sub>4</sub><sup>3-</sup>, 9.3 mM NH<sub>4</sub><sup>+</sup>; +N) or P2 (20 mM PO<sub>4</sub><sup>3-</sup>; -N) supplemented with 0.5 mM  
289 MgSO<sub>4</sub>, 0.5 mM CaCl<sub>2</sub>, 0.01 mM FeSO<sub>4</sub> and 0.2% glucose (respectively M2G or  
290 P2G) media at 28-30 °C. Growth was monitored by following the optical density at  
291 660 nm (OD<sub>660</sub>) during 24 hrs, in an automated plate reader (Epoch 2, Biotek) with  
292 continuous shaking at 30 °C. Motility was monitored on PYE swarm (0.3 % agar)  
293 plates. Area of the swarm colonies were quantified with ImageJ software as  
294 described previously (Ronneau et al., 2016). For kinetic experiments with  
295 *Sinorhizobium meliloti* (**Figure 5 – figure supplement 1d**), bacteria were cultivated  
296 overnight at 30 °C in LBMC (LB broth with 2.5 mM MgSO<sub>4</sub> and 2.5 mM CaCl<sub>2</sub>)  
297 supplemented with kanamycin, then back-diluted in LBMC during 3 hrs before  
298 induction with 0.1 mM IPTG. Samples were taken each hour during 5 hrs. For *E. coli*,  
299 antibiotics were used at the following concentrations (µg/ml; in liquid/solid medium):  
300 ampicillin (50/100), kanamycin (30/50), oxytetracycline (12.5/12.5) where  
301 appropriate. For *C. crescentus*, media were supplemented with kanamycin (5/20),  
302 tetracycline (1/2.5) where appropriate. The doubling time of *Caulobacter* strains was  
303 calculated in exponential phase (OD<sub>660</sub>: 0.2 - 0.5) using  $D = [\ln(2) \cdot (T_{(B)} - T_{(A)})] /$   
304  $[\ln(OD_{660(B)}) - \ln(OD_{660(A)})]$  and normalized according to the wild-type strain. *E. coli*  
305 S17-1 and *E. coli* MT607 helper strains were used for transferring plasmids to *C.*  
306 *crescentus* by respectively bi- and tri-parental mating. In-frame deletions were  
307 created by using pNPTS138-derivative plasmids and by following the procedure  
308 described previously (Ronneau et al., 2016).

### 309 **Bacterial two-hybrid assays**

310 Bacterial two-hybrid (BTH) assays were performed as described previously in  
311 (Ronneau et al., 2016). Briefly, 2  $\mu$ l of MG1655 *cyaA::frt* (RH785) and MG1655  
312 *cyaA::frt*  $\Delta npr$  (RH2122) strains expressing T18 and T25 fusions were spotted on  
313 MacConkey Agar Base plates supplemented with ampicillin, kanamycin, maltose  
314 (1%), and incubated for 1 day at 30 °C. All proteins were fused to T25 (pKT25) or T18  
315 (pUT18C) at their N-terminal extremity. The  $\beta$ -galactosidase assays were performed  
316 as described in (Ronneau et al., 2016). Briefly, 50  $\mu$ l *E. coli* BTH strains cultivated  
317 overnight at 30° C in LB medium supplemented with kanamycin, ampicillin and IPTG  
318 (1 mM) were resuspended in 800  $\mu$ l of Z buffer (60 mM Na<sub>2</sub>HPO<sub>4</sub>, 40 mM NaH<sub>2</sub>PO<sub>4</sub>,  
319 10 mM KCl, 1 mM MgSO<sub>4</sub>) and lysed with chloroform. After the addition of 200  $\mu$ l  
320 ONPG (4 mg/ml), reactions were incubated at 30° C until color turned yellowish.  
321 Reactions were then stopped by adding 500  $\mu$ l of 1 M Na<sub>2</sub>CO<sub>3</sub>, and absorbance at  
322 420 nm was measured. Miller Units are defined as  $(OD_{420} \times 1,000) / (OD_{590} \times t \times v)$ ,  
323 where “OD<sub>590</sub>” is the absorbance of the cultures at 590 nm before the  $\beta$ -  
324 galactosidase assays, “t” is the time of the reaction (min), and “v” is the volume of  
325 cultures used in the assays (ml). All the experiments were performed with at least  
326 three biological replicates.

### 327 **Flow cytometry analysis**

328 DNA content was measured using Fluorescence-Activated Cell Sorting (FACS) as  
329 described previously in (Ronneau et al., 2016). Briefly, cells were fixed in ice-cold  
330 70% Ethanol. Fixed samples were then washed twice in FACS staining buffer (10  
331 mM Tris pH 7.2, 1 mM EDTA, 50 mM NaCitrate, 0.01% Triton X-100) containing 0.1  
332 mg/ml RNaseA and incubated at room temperature (RT) for 30 min. Cells were then  
333 harvested by centrifugation for 2 min at 8,000 x g, resuspended in 1 ml FACS  
334 staining buffer containing 0.5  $\mu$ M Sytox Green Nucleic acid stain (Life Technologies),  
335 and incubated at RT in the dark for 5 min. Samples were analyzed in flow cytometer  
336 (FACS Calibur, BD Biosciences) at laser excitation of 488 nm. Percentage of gated  
337 G1 cells of each strain was then normalized using gated G1 cells of the wild-type  
338 strain as reference.

### 339 **Detection of intracellular (p)ppGpp levels**

340 (p)ppGpp levels were visualized as described previously in (Ronneau et al., 2016) for  
341 *Caulobacter crescentus* (Cc) and in (Krol and Becker, 2011; Wells and Long, 2002)

342 for *Sinorhizobium meliloti* (Sm). Briefly, strains were grown overnight in PYE and then  
343 diluted for a second overnight culture in M5GG (Cc) or grown overnight in LBMC  
344 medium (Sm). Then, cells were diluted a second time in M5GG (Cc) or in LBMC  
345 medium (Sm) and grown for 3 hrs to reach an OD<sub>660</sub> of 0.5 (Cc) or 0.7 (Sm). Cells  
346 were then split into two parts and washed twice with P5G-labelling buffer (Cc;  
347 (Ronneau et al., 2016)) or with MOPS-MGS without glutamate (Sm; (Mendrygal and  
348 Gonzalez, 2000)). One milliliter of cells were then resuspended in 225 µl of P5G-  
349 labelling (-N) or M5G-labelling (+N) for *C. crescentus* and in 225 µl of MOPS-MGS  
350 with (+N) or without (-N) glutamate and 0.05% NH<sub>4</sub><sup>+</sup> for *S. meliloti*. In addition, media  
351 were supplemented with 25 µl of KH<sub>2</sub><sup>32</sup>PO<sub>4</sub> at 100 µCi ml<sup>-1</sup> and incubated for 1 hr  
352 (Sm) or 2 hrs (Cc) with shaking at 30 °C. Then, samples were extracted with an equal  
353 volume of 2 M formic acid, placed on ice for 20 min and then stored overnight at -20  
354 °C. All cell extracts were pelleted at 14,000 rpm (18,000 x g) for 3 min and 6 x 2 µl  
355 (Cc) or 3 x 2 µl (Sm) of supernatant were spotted onto a polyethyleneimine (PEI)  
356 plate (Macherey-Nagel). PEI plates were then developed in 1.5 M KH<sub>2</sub>PO<sub>4</sub> (pH 3.4)  
357 at room temperature. Finally, TLC plates were imaged on a MS Storage Phosphor  
358 Screen (GE Healthcare) and analysed with Cyclone Phosphor Imager (PerkinElmer).  
359 For hydrolase experiments (**Figure 3C**), cells were incubated 1 hr in P5G  
360 supplemented with xylose (0.1%). Then, cells were washed twice with P5G-labelling  
361 and resuspended in P5G-labelling (-N) supplemented with KH<sub>2</sub><sup>32</sup>PO<sub>4</sub>, xylose (0.1%)  
362 and glutamine (9.3 mM).

### 363 **β-galactosidase assay**

364 The β-galactosidase assays performed to measure P<sub>spoT</sub>-lacZ activity were  
365 essentially done as for the BTH assay with the following modifications. One milliliter  
366 of *Caulobacter* strains harbouring the P<sub>spoT</sub>-lacZ fusion was resuspended in 800 µl of  
367 Z buffer and the absorbance of the cultures at 660 nm (OD<sub>660</sub>) instead of 590 nm was  
368 measured before the β-galactosidase assays. All the experiments were performed  
369 with three biological replicates and were normalized according to the wild-type strain  
370 harbouring the P<sub>spoT</sub>-lacZ fusion cultivated at 30°C.

### 371 **Immunoblot analysis**

372 Immunoblot analyses were performed as described in (Beaufay et al., 2015) with the  
373 following primary antibodies: anti-MreB (1:5,000) (Beaufay et al., 2015), anti-SpoT

374 (1:5,000) and secondary antibodies: anti-rabbit linked to peroxidase (GE Healthcare)  
375 at 1:5,000, and visualized thanks to Western Lightning Plus-ECL chemiluminescence  
376 reagent (Biorad) and ImageQuant LAS400 (GE Healthcare).

### 377 **Proteins purification**

378 The purification of *B. subtilis* EI was essentially done as described in (Galinier et al.,  
379 1997), with the modifications indicated below. Genes encoding *C. crescentus* SpoT,  
380 SpoT<sub>D81G</sub>, SpoT<sub>1-373</sub>, SpoT<sub>ΔACT</sub>, as well as HPr, EIIA<sup>Ntr</sup>, EIIA<sup>Ntr</sup><sub>H66E</sub> and EIIA<sup>Ntr</sup><sub>H66A</sub> were  
381 transformed into *E. coli* BL21 (DE3) for protein production. In the case of *B. subtilis* EI,  
382 *E. coli* NM522 was transformed with plasmid pQE-30-*ptsI*\_Bs as described in  
383 (Galinier et al., 1997) for protein expression.

384 Each protein contains an N-terminal 6His-tag for purification by Ni-NTA  
385 chromatography. Cells were grown to an OD<sub>600</sub> of ~ 0.7 in LB medium (1 L) at 37 °C.  
386 Isopropyl-β-D-thiogalactoside (IPTG) was added to a final concentration of 0.5 mM  
387 and incubated overnight at 28 °C. Cells were harvested by centrifugation for 20 min  
388 at 6,000 x g, 4°C, resuspended in KCl 8 mM, TCEP 1 mM, MgCl<sub>2</sub> 2 mM, Tris 50 mM  
389 at pH 8, Protease Inhibitor Cocktail (Roche) and lysed with a cell disruptor at 60 psi in  
390 KCl 500 mM, TCEP 2 mM, Tris 50 mM at pH 8, NaCl 500 mM, glycerol 1%, Protease  
391 Inhibitor Cocktail. The lysis extract was centrifuged for 20 min at 25,000 x g, 4°C.  
392 Supernatants were loaded onto a HisTrap HP 1 ml column (GE Healthcare) in  
393 HEPES 50 mM, KCl 500 mM, NaCl 500 mM, MgCl<sub>2</sub> 2 mM, TCEP 1 mM, glycerol 2%,  
394 mellitic acid 0.002%, Protease Inhibitor Cocktail (Roche), imidazole 5 mM, pH 7.5  
395 and eluted with imidazole. The fractions recovered from the Ni-NTA were further  
396 purified by size exclusion chromatography (Superdex 200, for SpoT, SpoT<sub>D81G</sub>,  
397 SpoT<sub>Cat</sub>, SpoT<sub>ΔACT</sub> and EI<sup>Ntr</sup>, and Superdex 75 for HPr, EIIA<sup>Ntr</sup>, EIIA<sup>Ntr</sup><sub>H66E</sub> and  
398 EIIA<sup>Ntr</sup><sub>H66A</sub>). Purified samples of SpoT were also used to immunize rabbits in order to  
399 produce anti-SpoT polyclonal antibodies.

### 400 ***In vitro* phosphorylation of EIIA<sup>Ntr</sup>**

401 To phosphorylate EIIA<sup>Ntr</sup>, *B. subtilis* EI, *C. crescentus* HPr and *C. crescentus* EIIA<sup>Ntr</sup>  
402 were mixed at final concentrations of 2.5 μM, 2.5 μM and 50 μM respectively, in  
403 phosphorylation buffer [25 mM Tris pH 7.4, 10 mM KCl, 10 mM MgCl<sub>2</sub>, 1 mM DTT]  
404 and incubated at 37 °C for 10 min. The phosphorylation mix was then incubated in 2  
405 mM of PEP at 37 °C for 30 min. Phosphorylated EIIA<sup>Ntr</sup> (EIIA<sup>Ntr</sup>~P) was further

406 purified by size exclusion chromatography on a Superdex 75 and dialysed for 72  
407 hours at 4°C, in HEPES 50 mM, KCl 500 mM, NaCl 500 mM, MgCl<sub>2</sub> 2 mM, TCEP 1  
408 mM, glycerol 2% and stored in glycerol 20%, at -20°C.

#### 409 ***In vitro* hydrolase assay**

410 To assess SpoT hydrolase activity, <sup>32</sup>PppGpp was synthesized by enzymatic reaction  
411 catalysed by RelA from *Chlorobaculum tepidum*. To synthesize <sup>32</sup>PppGpp, 1 μM of  
412 RelA<sub>Ctep</sub> was incubated in TCEP 1 mM, MgCl<sub>2</sub> 1 mM, NaCl 50 mM, Tris 10 mM at pH  
413 7.4. Then, 100 μM GDP were added to the synthesis reaction and incubated for 10  
414 min at 37 °C, followed by an addition of 3 pM [<sup>γ</sup><sup>32</sup>P] ATP (PerkinElmer) incubated for  
415 45 min, 37°C. <sup>32</sup>PppGpp was extracted from the reaction medium by centrifugation in  
416 Amicon 3K Centrifugal filter (Millipore) at 13,000 x g for 25 min. The hydrolase  
417 assays were performed by incubating for 10 min at 37 °C (i) 1 or 2 μM of SpoT<sub>1-373</sub> or  
418 SpoT<sub>ΔACT</sub> (**Figure 4a**), (ii) 1 μM of SpoT with increasing concentrations of EIIA<sup>Ntr</sup>,  
419 EIIA<sup>Ntr</sup><sub>H66A</sub> or EIIA<sup>Ntr</sup><sub>H66E</sub> (5, 10 and 20 μM) (**Figure 4b-c**) or (iii) 1 μM of SpoT with 20  
420 μM of purified EIIA<sup>Ntr</sup>~P (**Figure 4 – figure supplement 1**). The reaction mix was  
421 then incubated with 10 μl of <sup>32</sup>PppGpp to a final volume of 30 μl. The reaction was  
422 stopped by adding 2 μl of 12 M formic acid. Reaction products were separated by  
423 thin layer chromatography (TLC) by transferring 2 μL of the reaction medium onto a  
424 TLC PEI Cellulose F membrane (Millipore). Chromatography membranes were  
425 placed in 1 M of KH<sub>2</sub>PO<sub>4</sub> buffer, pH 3.0, for 50 min at room temperature. The dried  
426 TLC membrane was placed in a Phosphor Screen plate (GE Healthcare) for 1 hr and  
427 the Phosphor Screen revealed with a phosphoimager.

428

## 429 **Acknowledgements**

430 We are grateful to Emanuele Biondi, Gabriele Klug, Anne Galinier and Josef  
431 Deutscher for providing strains and/or plasmids. We thank the members of the BCcD  
432 team for critical reading of the manuscript and helpful discussions; Guy Houbeau at  
433 the Animal Care Facility of the University of Namur for immunizing rabbits with  
434 purified SpoT. This work was supported by a Research Credit (CDR J.0169.16) from  
435 the Fonds de la Recherche Scientifique – FNRS to R.H and FNRS-EQP U.N043.17F,  
436 FRFS-WELBIO grant (CR-2017S-03), FNRS-PDR (PDR-T.0066.18) to A.G-P, the  
437 Programme ‘Actions de Recherche Concertée’ 2016-2021 from the ULB and the  
438 Fonds d’Encouragement à la Recherche ULB (FER-ULB) to A.G-P. S.R. was and  
439 J.C-M. is holding a FRIA (Fund for Research Training in Industry and Agriculture)  
440 fellowship from the Fonds de la Recherche Scientifique – FNRS. R.H. is a Research  
441 Associate of the Fonds de la Recherche Scientifique – FNRS.

442

## 443 **Author Contributions**

444 S.R. and R.H conceived and designed the experiments. S.R. performed all the  
445 experiments except otherwise stated. A.M. did the cloning and preliminary tests for  
446 proteins purification and *in vitro* phosphorylation assays. J.C-M purified the proteins  
447 for the biochemical assays and performed the *in vitro* HD assays (Figure 4). S.R.,  
448 J.C-M, A.G-P and R.H analyzed the data. S.R. and R.H. wrote the paper.

449

## 450 **Competing financial interests**

451 The authors declare no competing financial interests.

452

453



## 454 **References**

- 455
- 456 Arenz, S., Abdelshahid, M., Sohmen, D., Payoe, R., Starosta, A.L., Berninghausen,  
457 O., Hauryliuk, V., Beckmann, R., and Wilson, D.N. (2016). The stringent factor RelA  
458 adopts an open conformation on the ribosome to stimulate ppGpp synthesis. *Nucleic  
459 Acids Res* *44*, 6471-6481.
- 460 Battesti, A., and Bouveret, E. (2006). Acyl carrier protein/SpoT interaction, the switch  
461 linking SpoT-dependent stress response to fatty acid metabolism. *Mol Microbiol* *62*,  
462 1048-1063.
- 463 Beaufay, F., Coppine, J., Mayard, A., Laloux, G., De Bolle, X., and Hallez, R. (2015).  
464 A NAD-dependent glutamate dehydrogenase coordinates metabolism with cell  
465 division in *Caulobacter crescentus*. *EMBO J* *34*, 1786-1800.
- 466 Boutte, C.C., and Crosson, S. (2011). The complex logic of stringent response  
467 regulation in *Caulobacter crescentus*: starvation signalling in an oligotrophic  
468 environment. *Mol Microbiol* *80*, 695-714.
- 469 Brown, A., Fernandez, I.S., Gordiyenko, Y., and Ramakrishnan, V. (2016).  
470 Ribosome-dependent activation of stringent control. *Nature* *534*, 277-280.
- 471 Casadaban, M.J., and Cohen, S.N. (1980). Analysis of gene control signals by DNA  
472 fusion and cloning in *Escherichia coli*. *J Mol Biol* *138*, 179-207.
- 473 Chiaverotti, T.A., Parker, G., Gallant, J., and Agabian, N. (1981). Conditions that  
474 trigger guanosine tetraphosphate accumulation in *Caulobacter crescentus*. *J  
475 Bacteriol* *145*, 1463-1465.
- 476 Curtis, P.D., and Brun, Y.V. (2010). Getting in the loop: regulation of development in  
477 *Caulobacter crescentus*. *Microbiol Mol Biol Rev* *74*, 13-41.
- 478 De Nisco, N.J., Abo, R.P., Wu, C.M., Penterman, J., and Walker, G.C. (2014). Global  
479 analysis of cell cycle gene expression of the legume symbiont *Sinorhizobium meliloti*.  
480 *Proc Natl Acad Sci U S A* *111*, 3217-3224.
- 481 Galinier, A., Haiech, J., Kilhoffer, M.C., Jaquinod, M., Stulke, J., Deutscher, J., and  
482 Martin-Verstraete, I. (1997). The *Bacillus subtilis* *crh* gene encodes a HPr-like protein  
483 involved in carbon catabolite repression. *Proc Natl Acad Sci U S A* *94*, 8439-8444.
- 484 Gentry, D.R., and Cashel, M. (1996). Mutational analysis of the *Escherichia coli* *spoT*  
485 gene identifies distinct but overlapping regions involved in ppGpp synthesis and  
486 degradation. *Mol Microbiol* *19*, 1373-1384.
- 487 Gonzalez, D., and Collier, J. (2014). Effects of (p)ppGpp on the progression of the  
488 cell cycle of *Caulobacter crescentus*. *J Bacteriol* *196*, 2514-2525.
- 489 Goodwin, R.A., and Gage, D.J. (2014). Biochemical characterization of a nitrogen-  
490 type phosphotransferase system reveals that enzyme EI(Ntr) integrates carbon and  
491 nitrogen signaling in *Sinorhizobium meliloti*. *J Bacteriol* *196*, 1901-1907.
- 492 Gropp, M., Strausz, Y., Gross, M., and Glaser, G. (2001). Regulation of *Escherichia*  
493 *coli* RelA requires oligomerization of the C-terminal domain. *J Bacteriol* *183*, 570-579.
- 494 Hallez, R., Delaby, M., Sanselicio, S., and Viollier, P.H. (2017). Hit the right spots:  
495 cell cycle control by phosphorylated guanosines in alphaproteobacteria. *Nat Rev  
496 Microbiol* *15*, 137-148.
- 497 Haseltine, W.A., and Block, R. (1973). Synthesis of guanosine tetra- and  
498 pentaphosphate requires the presence of a codon-specific, uncharged transfer  
499 ribonucleic acid in the acceptor site of ribosomes. *Proc Natl Acad Sci U S A* *70*,  
500 1564-1568.

501 Hauryliuk, V., Atkinson, G.C., Murakami, K.S., Tenson, T., and Gerdes, K. (2015).  
502 Recent functional insights into the role of (p)ppGpp in bacterial physiology. *Nat Rev*  
503 *Microbiol* **13**, 298-309.

504 Jain, V., Saleem-Batcha, R., China, A., and Chatterji, D. (2006). Molecular dissection  
505 of the mycobacterial stringent response protein Rel. *Protein Sci* **15**, 1449-1464.

506 Krol, E., and Becker, A. (2011). ppGpp in *Sinorhizobium meliloti*: biosynthesis in  
507 response to sudden nutritional downshifts and modulation of the transcriptome. *Mol*  
508 *Microbiol* **81**, 1233-1254.

509 Lee, C.R., Park, Y.H., Kim, M., Kim, Y.R., Park, S., Peterkofsky, A., and Seok, Y.J.  
510 (2013). Reciprocal regulation of the autophosphorylation of enzyme INtr by glutamine  
511 and alpha-ketoglutarate in *Escherichia coli*. *Mol Microbiol* **88**, 473-485.

512 Lesley, J.A., and Shapiro, L. (2008). SpoT regulates DnaA stability and initiation of  
513 DNA replication in carbon-starved *Caulobacter crescentus*. *J Bacteriol* **190**, 6867-  
514 6880.

515 Loveland, A.B., Bah, E., Madireddy, R., Zhang, Y., Brilot, A.F., Grigorieff, N., and  
516 Korostelev, A.A. (2016). Ribosome\*RelA structures reveal the mechanism of  
517 stringent response activation. *Elife* **5**.

518 Mechold, U., Murphy, H., Brown, L., and Cashel, M. (2002). Intramolecular regulation  
519 of the opposing (p)ppGpp catalytic activities of Rel(Seq), the Rel/Spo enzyme from  
520 *Streptococcus equisimilis*. *J Bacteriol* **184**, 2878-2888.

521 Mendrygal, K.E., and Gonzalez, J.E. (2000). Environmental regulation of  
522 exopolysaccharide production in *Sinorhizobium meliloti*. *J Bacteriol* **182**, 599-606.

523 Potrykus, K., and Cashel, M. (2008). (p)ppGpp: still magical? *Annu Rev Microbiol* **62**,  
524 35-51.

525 Ronneau, S., Petit, K., De Bolle, X., and Hallez, R. (2016). Phosphotransferase-  
526 dependent accumulation of (p)ppGpp in response to glutamine deprivation in  
527 *Caulobacter crescentus*. *Nat Commun* **7**, 11423.

528 Wells, D.H., and Long, S.R. (2002). The *Sinorhizobium meliloti* stringent response  
529 affects multiple aspects of symbiosis. *Mol Microbiol* **43**, 1115-1127.

530  
531

532 **Figures with figure legends**

533

**Figure 1**

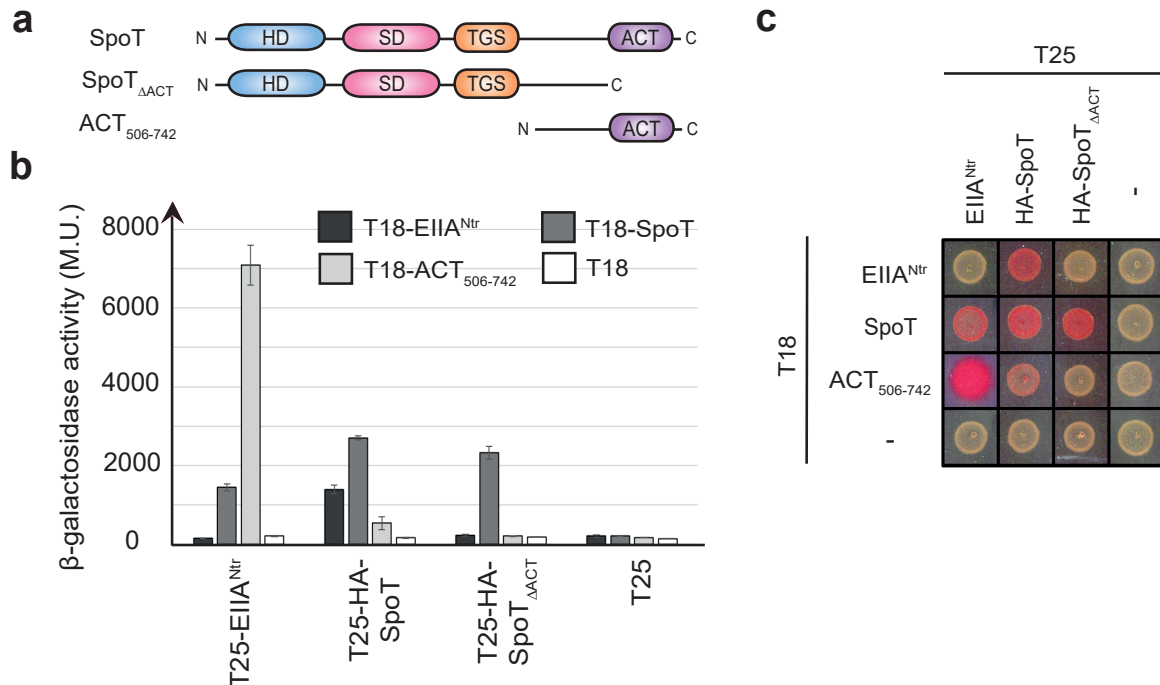

534

535

536 **Figure 1** The ACT domain is required for the interaction between SpoT and EIIA<sup>Ntr</sup>~P  
 537 in a bacterial two-hybrid assay.

538 (a) Domain organization of *C. crescentus* SpoT with the catalytic domains, “hydrolase  
 539 domain” (HD) and “synthetase domain” (SD), located at the N-terminal extremity and  
 540 the regulatory domains, “ThrRS, GTPase and SpoT” (TGS) and “Aspartokinase,  
 541 Chorismate mutase and TyrA” (ACT), located at the C-terminal end.

542 (b) SpoT and ACT<sub>506-742</sub>, but not SpoT<sub>ΔACT</sub>, directly interact with EIIA<sup>Ntr</sup>~P. β-  
 543 galactosidase assays were performed on MG1655 *cyaA::frit* (RH785) strains  
 544 coexpressing T18- fused to *ptsN*, *spoT*, *ACT*<sub>506-742</sub> or alone with T25- fused to *ptsN*,  
 545 *HA-spoT*, *HA-spoT*<sub>ΔACT</sub> or alone. Error bars = SD, n = 3. The same strains were  
 546 spotted on MacConkey Agar Base plates supplemented with 1% maltose. Plates  
 547 were incubated for one day at 30 °C. The red color indicates positive interactions.

**Figure 2**

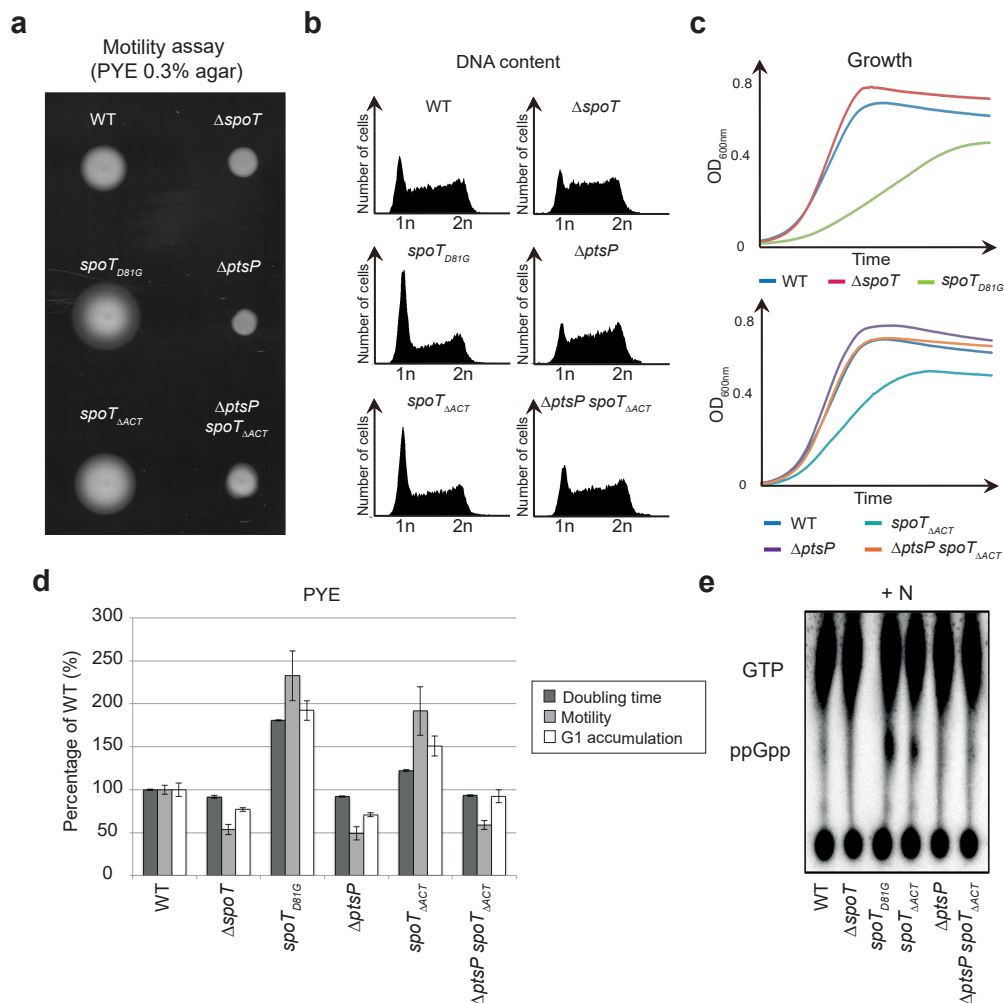

548

549 **Figure 2** Deletion of the ACT domain of SpoT leads to (p)ppGpp accumulation, which  
 550 consequently extends the G1/swarmer cell lifetime of *C. crescentus*.

551 (a-d) Extension of the G1/swarmer lifetime in *spoT*<sub>ΔACT</sub> cells is suppressed by the  
 552 deletion of *ptsP* (encoding EI<sup>Ntr</sup>). Motility (a), DNA content (b) and growth (c) were  
 553 measured in WT (RH50), *ΔspoT* (RH1755), *spoT*<sub>D81G</sub> (RH1752), *ΔptsP* (RH1758),  
 554 *spoT*<sub>ΔACT</sub> (RH1476) and *ΔptsP spoT*<sub>ΔACT</sub> (RH1478) grown in complex media (PYE).  
 555 (d) Data shown in a-c were normalized to the WT (100%). Error bars = SD, n = 3.

556 (e) Deletion of the ACT domain leads to (p)ppGpp accumulation. The intracellular  
 557 levels of (p)ppGpp were evaluated by TLC after nucleotides extraction from the same  
 558 strains grown in nitrogen-replete (+N) conditions.

### Figure 3

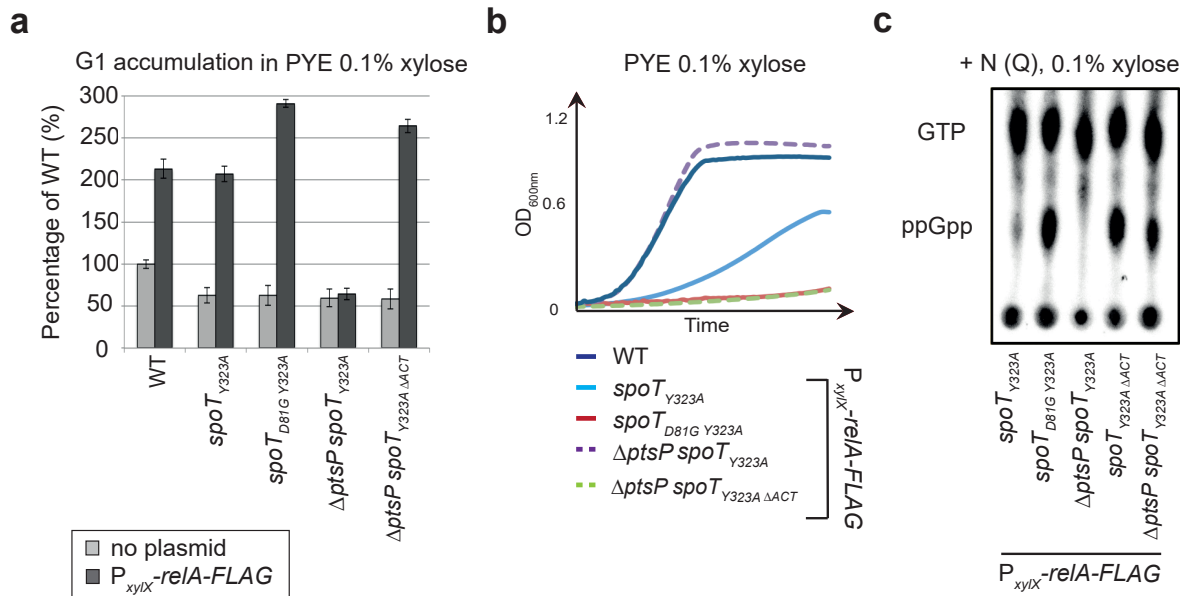

559

560 **Figure 3** The ACT domain is required *in vivo* to support the hydrolase activity of  
561 SpoT.

562 (a-b) Absence of the ACT domain of SpoT promotes G1 accumulation and decreases  
563 growth rate upon artificial exogenous production of (p)ppGpp. (a) Flow cytometry  
564 analysis to determine DNA content in asynchronous population and (b) growth of WT  
565 (RH50),  $spoT_{Y323A}$  (RH1844),  $spoT_{D81G Y323A}$  (RH2193),  $\Delta ptsP spoT_{Y323A}$  (RH2196)  
566 and  $\Delta ptsP spoT_{Y323A \Delta ACT}$  (RH2491) with (black bars) or without (grey bars)  
567  $P_{xyiX}::relA-FLAG$  in PYE medium supplemented with 0.1% of xylose. The flow  
568 cytometry data were normalized to the WT without  $P_{xyiX}::relA-FLAG$  (100%). Error  
569 bars = SD, n = 3.

570 (c) The regulatory ACT domain of SpoT is required *in vivo* to degrade (p)ppGpp in  
571 nitrogen-replete condition (+N). The intracellular levels of (p)ppGpp were evaluated  
572 by TLC after nucleotides extraction from  $spoT_{Y323A}$  (RH1844),  $spoT_{D81G Y323A}$   
573 (RH2193),  $\Delta ptsP spoT_{Y323A}$  (RH1586),  $spoT_{Y323A \Delta ACT}$  (RH2491) and  $\Delta ptsP spoT_{Y323A}$   
574  $\Delta ACT$  (RH2491) harbouring  $P_{xyiX}::relA-FLAG$  and grown in nitrogen-replete (+N) media  
575 supplemented with 0.1% xylose.



**Figure 5**

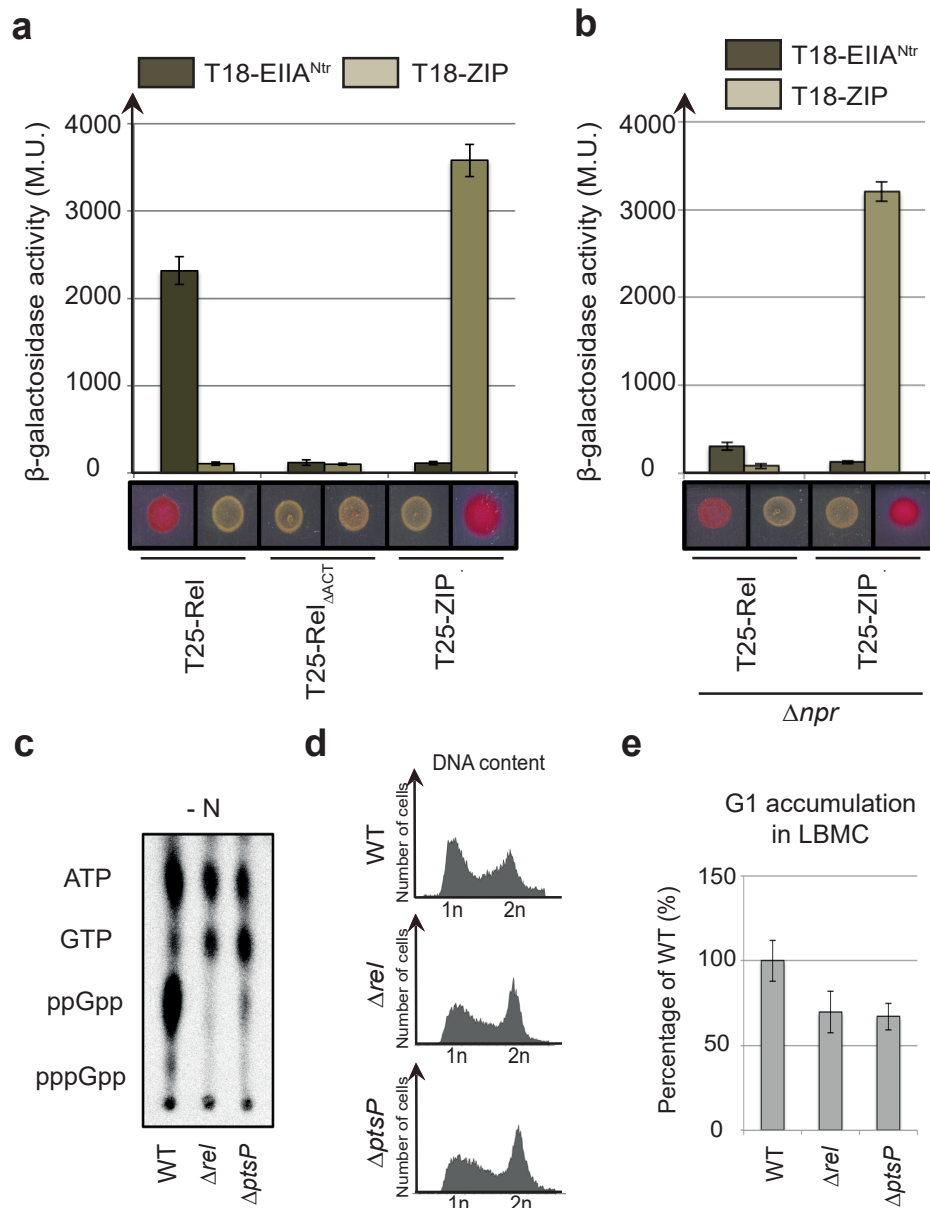

592

593 **Figure 5** PTS<sup>Ntr</sup> modulates (p)ppGpp accumulation and cell cycle progression in  
594 *Sinorhizobium meliloti*.

595 (a-b) EIIA<sup>Ntr</sup> interacts with Rel in a ACT-dependent way. β-galactosidase assays were  
596 performed on (a) MG1655 *cyaA::frit* (RH785) or (b) MG1655 *cyaA::frit* Δ*npr* (RH2122)  
597 strains coexpressing T18- fused to *ptsN* or *ZIP* with T25- fused to *rel*, *rel*<sub>ΔACT</sub> or *ZIP*.  
598 Error bars = SD, n = 3. The same strains were spotted on MacConkey Agar Base  
599 plates supplemented with 1% maltose. Plates were incubated for one day at 30 °C.  
600 The red color indicates positive interactions.

601 (c-e) A functional PTS<sup>Ntr</sup> is required for (p)ppGpp accumulation in *S. meliloti* upon  
602 nitrogen starvation (-N) and for cell cycle progression in nitrogen-replete (+N)  
603 condition. (c) The intracellular levels of (p)ppGpp were evaluated by TLC after  
604 nucleotides extraction from WT (RH2000),  $\Delta relA$  (RH2327) and  $\Delta ptsP$  (RH2326)  
605 grown in nitrogen-deplete (-N) conditions. (d-e) DNA content (d) and G1 proportion  
606 (e) were measured in the same strains grown in complex media (LBMC). G1  
607 proportions were normalized to the WT (100%). Error bars = SD, n = 3.  
608



609

Figure 6

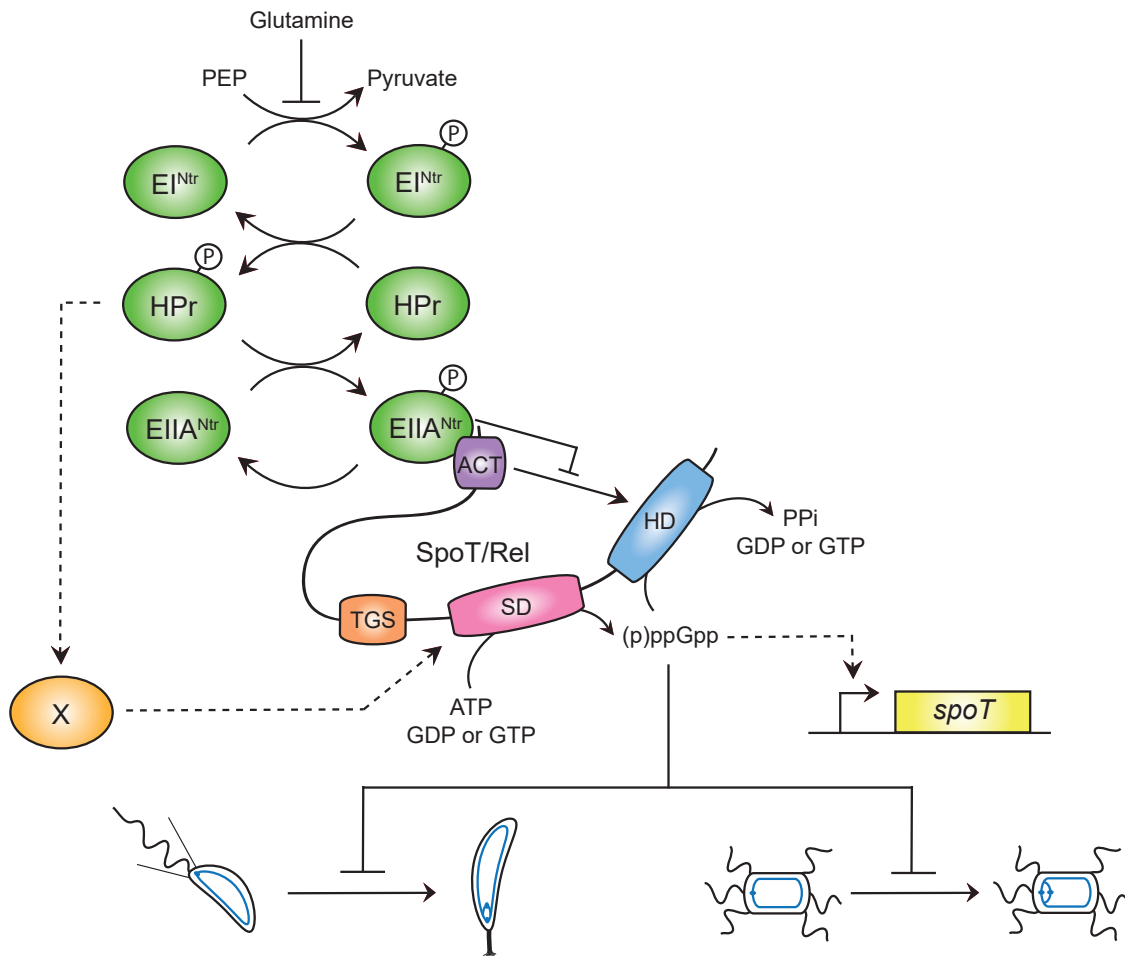

610

611 **Figure 6** EIIA<sup>Ntr</sup>~P binds the ACT domain of SpoT to inhibit its hydrolase activity  
 612 (HD). Upon nitrogen starvation (*i.e.* glutamine deprivation), EI<sup>Ntr</sup> phosphorylates its  
 613 downstream components, HPr and EIIA<sup>Ntr</sup>. As a consequence, EIIA<sup>Ntr</sup>~P interacts  
 614 with ACT to inhibit its stimulating effect on the hydrolase activity (HD) of SpoT. This  
 615 inhibition avoids to degrade (p)ppGpp produced by the synthetase domain (SD), this  
 616 latter being strongly stimulated by HPr~P by an unknown mechanism. In addition,  
 617 increasing the (p)ppGpp level promotes the accumulation of the SpoT protein by a  
 618 positive feedback loop mechanism on transcription of the *spoT* gene. Ultimately, the  
 619 burst of (p)ppGpp delays the G1-to-S transition of *C. crescentus* (left) and *S. meliloti*  
 620 (right) cells.
